# Supplementary material for: Comparative Evaluation of Anesthetic Delivery Systems on Pain, Anxiety, and Physiological Responses in Pediatric Dental Patients: A Randomized Clinical Trial
Source: Research Square preprint supplement (doi:10.21203/rs.3.rs-8688156/v1), 2026-02-05
Supplement: Supplementary file 1 [file d1a4e40c1a06e7d88417d505.docx]

**Supplementary table:**

**Table A**: Summarizes the main differences between groups anesthesia delivery methods.

| **Group** | **Device** | **Needle** | **Anesthetic Solution** | **Volume** | **Duration** | **Special Features** |
| --- | --- | --- | --- | --- | --- | --- |
| Conventional syringe | Standard syringe | 27G | Lidocaine 2% w/ epinephrine 1:100,000 | 1 cartridge | 60 seconds | Standard |
| Vibration- assisted | VibraJect® | 27G | Lidocaine 2% w/ epinephrine 1:100,000 | 1 cartridge | 60 seconds | Vibration |
| Needle-free | Comfort-in™ | N/A | Lidocaine 2% w/ epinephrine 1:100,000 | 0.3 cc | Instant | Needle-free, high-pressure |
| CCLAD | Star Pen® | 27G | Lidocaine 2% w/ epinephrine 1:100,000 | 1 cartridge | 60 seconds | Computer-controlled flow |
